# Supplementary material for: The electrocapacitive properties of graphene oxide reduced by urea
Source: Royal Society of Chemistry journal article supplement (doi:10.1039/c1ee02478g), 2011-11-03
Supplement: c1ee02478g.pdf [file c1ee02478g.pdf]

## **Electronic Supplementary Information**

### **The electrocapacitive properties of graphene oxide reduced by urea**

Zhibin Lei,<sup>a</sup> Li Lu,<sup>\*a</sup> X. S. Zhao<sup>\*b</sup>

<sup>a</sup> *Department of Mechanical Engineering, National University of Singapore, 4  
Engineering Drive 4, 117576, Singapore.*

<sup>b</sup> *School of Chemical Engineering, The University of Queensland, ST Lucia, Brisbane,  
QLD 4072, Australia.*

\*Corresponding Authors:

Prof./Dr. Li Lu, Department of Mechanical Engineering, National University of  
Singapore, 9 Engineering Drive 1, Singapore 117576, Singapore  
Tel: +65-65162236; Fax: +65-67791459; E-mail: [luli@nus.edu.sg](mailto:luli@nus.edu.sg)

Prof./Dr. X. S. (George) Zhao, School of Chemical Engineering, Faculty of  
Engineering, Architecture and Information Technology, The University of Queensland,  
St Lucia, Brisbane, QLD 4072, Australia,  
Tel: +61-7-33469997; Fax: 61-7-33654199; Email: [george.zhao@uq.edu.au](mailto:george.zhao@uq.edu.au)

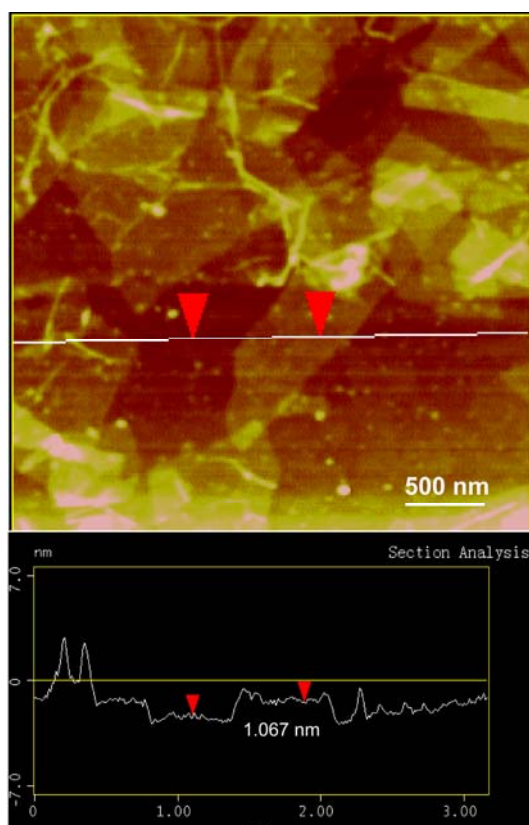

**Fig. S1** AFM image of GO deposited on a silicon wafer and height profile from AFM images for selected line across one of the sheet.

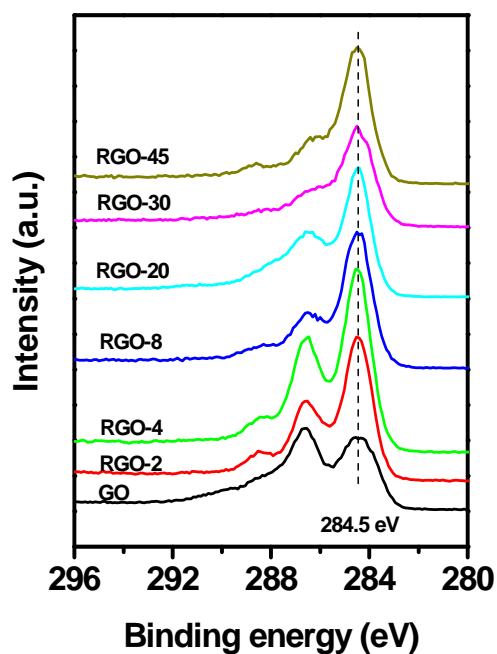

**Fig. S2** C 1s XPS spectra of RGO reduced with urea for different times.

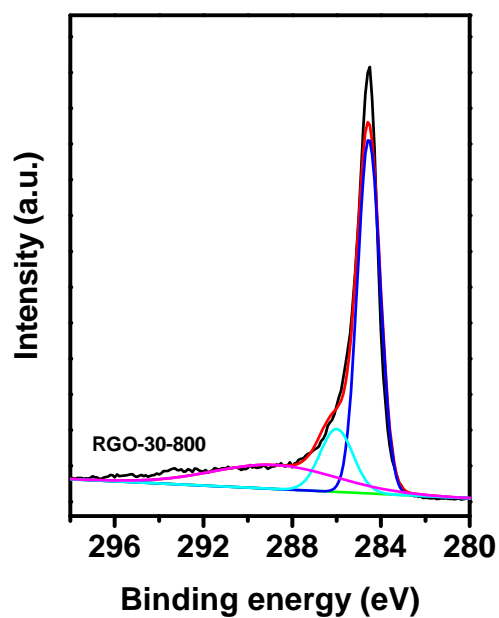

**Fig. S3** C 1s spectrum and its deconvolution curves of sample RGO-30-800.

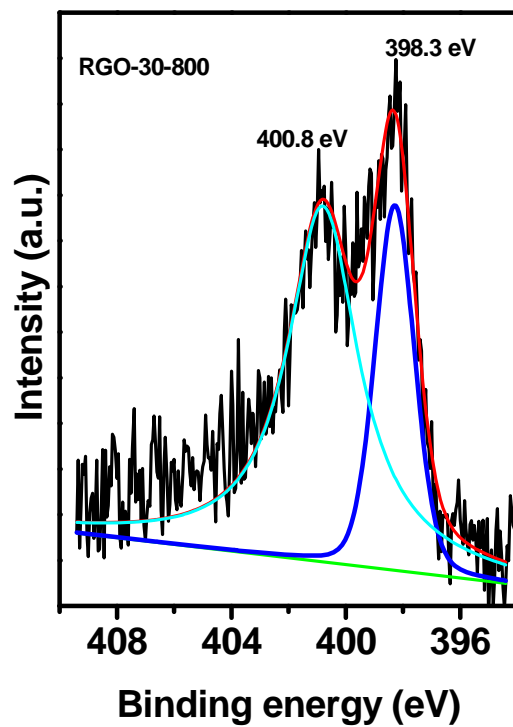

**Fig. S4** N 1s spectrum and its deconvolution curves of sample RGO-30-800.

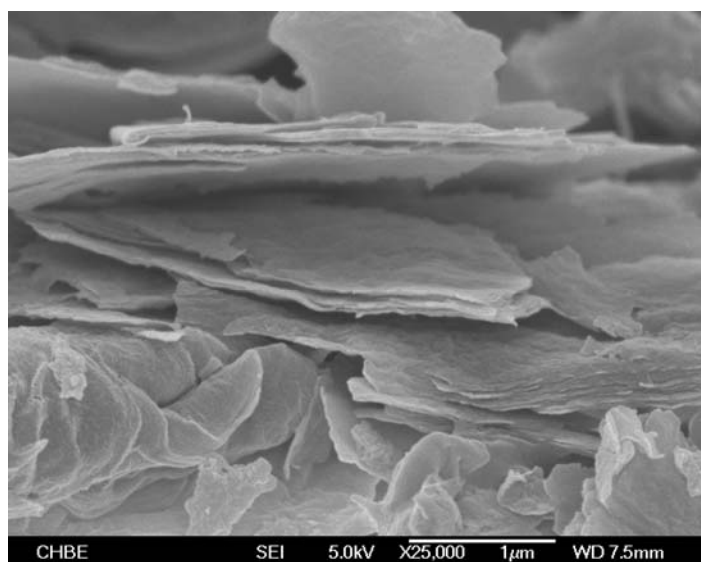

**Fig. S5** FESEM image of RGO paper after thermal annealing at 800 °C for 1 h.
